# Supplementary material for: Crosstalk between leukocytes triggers differential immune responses against Salmonella enterica serovars Typhi and Paratyphi
Source: PubMed Central journal article supplement (PMC6709971; doi:10.1371/journal.pntd.0007650), 2019-08-14

**(A) Trypan Blue Exclusion**

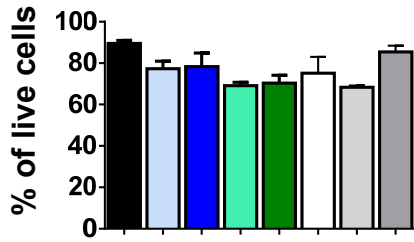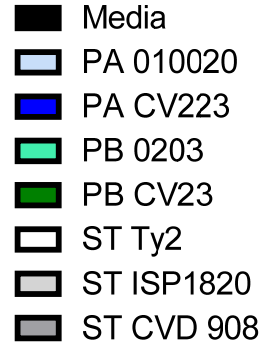

**(B) Control unstained cells**

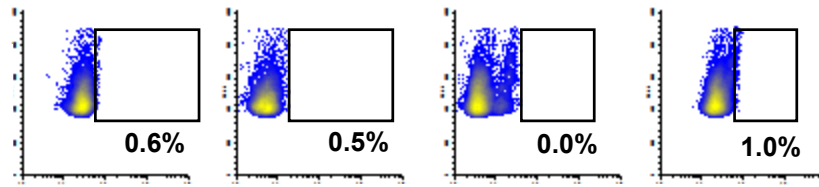

**Control media (unstimulated)**

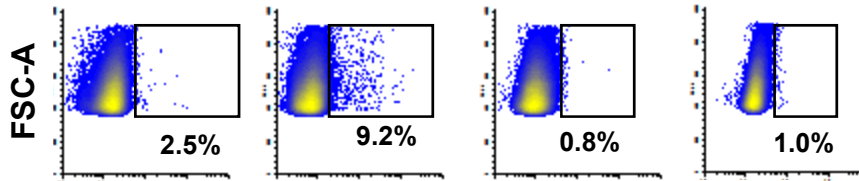

**Stimulated with PA strain 010020**

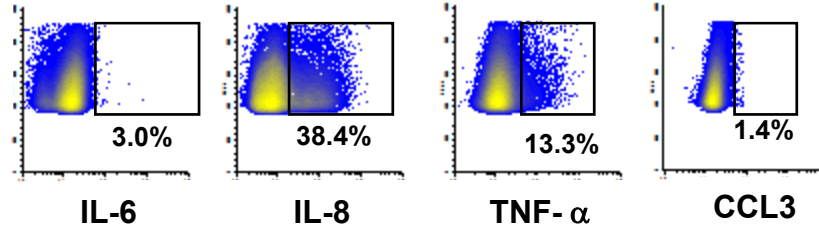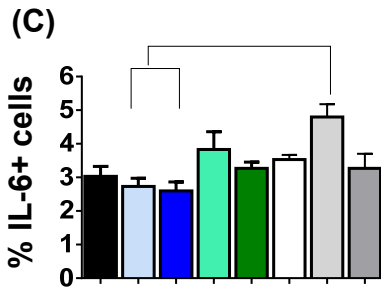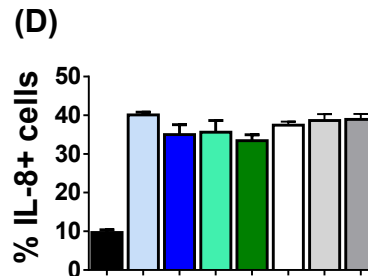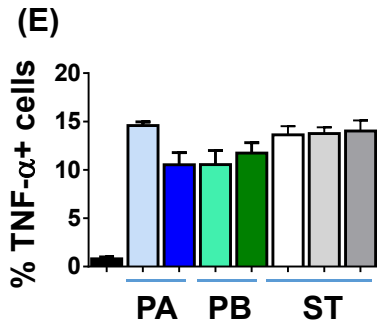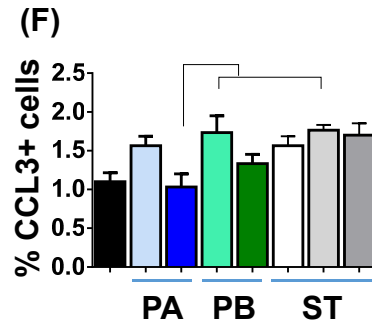

Supplement: pntd.0007650.s001.pdf [file pntd.0007650.s001.pdf]
