# Supplementary material for: Crosstalk between leukocytes triggers differential immune responses against Salmonella enterica serovars Typhi and Paratyphi
Source: PubMed Central journal article supplement (PMC6709971; doi:10.1371/journal.pntd.0007650), 2019-08-14
Supplement: pntd.0007650.s002.pdf [file pntd.0007650.s002.pdf]

**(A) Macrophages**

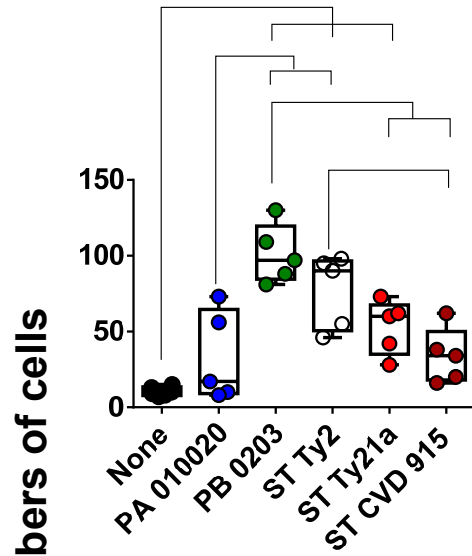

**(B) Neutrophils**

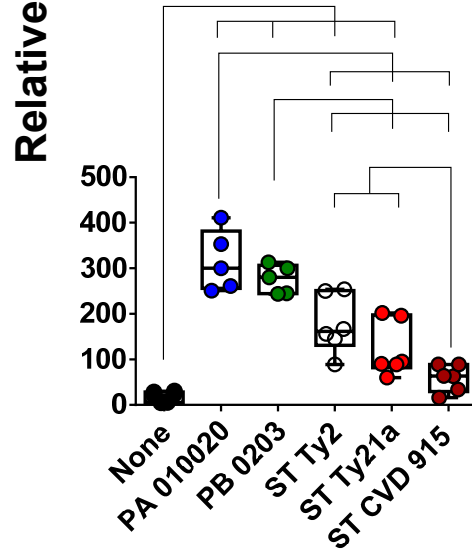

***Salmonella enterica* serovars**
