# Supplementary material for: Crosstalk between leukocytes triggers differential immune responses against Salmonella enterica serovars Typhi and Paratyphi
Source: PubMed Central journal article supplement (PMC6709971; doi:10.1371/journal.pntd.0007650), 2019-08-14
Supplement: pntd.0007650.s006.pdf [file pntd.0007650.s006.pdf]

**S4 Table.** Statistical analyses of **Fig 6B**

| 1way ANOVA                     | Significant? | Individual <i>P</i> Value |
|--------------------------------|--------------|---------------------------|
| None 1 <sup>†</sup> vs. PA 1   | Yes          | < 0.0001                  |
| None 1 vs. PB 1                | Yes          | < 0.0001                  |
| None 1 vs. ST 1                | Yes          | < 0.0001                  |
| None 1 vs. None 2 <sup>‡</sup> | No           | 0.0666                    |
| None 1 vs. PA 2                | Yes          | < 0.0001                  |
| None 1 vs. PB 2                | Yes          | < 0.0001                  |
| None 1 vs. ST 2                | Yes          | < 0.0001                  |
| PA 1 vs. PB 1                  | Yes          | < 0.0001                  |
| PA 1 vs. ST 1                  | Yes          | < 0.0001                  |
| PA 1 vs. None 2                | Yes          | < 0.0001                  |
| PA 1 vs. PA 2                  | Yes          | 0.0001                    |
| PA 1 vs. PB 2                  | Yes          | < 0.0001                  |
| PA 1 vs. ST 2                  | Yes          | 0.0307                    |
| PB 1 vs. ST 1                  | No           | 0.0651                    |
| PB 1 vs. None 2                | Yes          | < 0.0001                  |
| PB 1 vs. PA 2                  | Yes          | 0.034                     |
| PB 1 vs. PB 2                  | Yes          | < 0.0001                  |
| PB 1 vs. ST 2                  | Yes          | 0.0001                    |
| ST 1 vs. None 2                | Yes          | < 0.0001                  |
| ST 1 vs. PA 2                  | No           | 0.9259                    |
| ST 1 vs. PB 2                  | Yes          | < 0.0001                  |
| ST 1 vs. ST 2                  | Yes          | < 0.0001                  |
| None 2 vs. PA 2                | Yes          | < 0.0001                  |
| None 2 vs. PB 2                | Yes          | < 0.0001                  |
| None 2 vs. ST 2                | Yes          | < 0.0001                  |
| PA 2 vs. PB 2                  | Yes          | < 0.0001                  |
| PA 2 vs. ST 2                  | Yes          | 0.0002                    |
| PB 2 vs. ST 2                  | Yes          | 0.0036                    |

†, culture with M $\phi$ -depleted PBMC

‡, culture with total PBMC
