# Supplementary material for: Crosstalk between leukocytes triggers differential immune responses against Salmonella enterica serovars Typhi and Paratyphi
Source: PubMed Central journal article supplement (PMC6709971; doi:10.1371/journal.pntd.0007650), 2019-08-14
Supplement: pntd.0007650.s007.pdf [file pntd.0007650.s007.pdf]

**S5 Table. Statistical analyses of Fig 7**

| 1way ANOVA                     | Elastase     |                    | Myeloperoxidase (MPO) |                    |
|--------------------------------|--------------|--------------------|-----------------------|--------------------|
|                                | Significant? | Individual P Value | Significant?          | Individual P Value |
| None 1 <sup>†</sup> vs. PA 1   | Yes          | < 0.0001           | Yes                   | 0.0001             |
| None 1 vs. PB 1                | No           | 0.1003             | Yes                   | 0.0065             |
| None 1 vs. ST 1                | Yes          | 0.0135             | Yes                   | 0.0425             |
| None 1 vs. None 2 <sup>‡</sup> | No           | 0.9636             | No                    | 0.1642             |
| None 1 vs. PA 2                | Yes          | 0.0004             | Yes                   | 0.0002             |
| None 1 vs. PB 2                | Yes          | < 0.0001           | Yes                   | < 0.0001           |
| None 1 vs. ST 2                | Yes          | < 0.0001           | Yes                   | < 0.0001           |
| PA 1 vs. PB 1                  | Yes          | 0.0135             | No                    | 0.3901             |
| PA 1 vs. ST 1                  | No           | 0.1003             | Yes                   | 0.0444             |
| PA 1 vs. None 2                | Yes          | < 0.0001           | Yes                   | < 0.0001           |
| PA 1 vs. PA 2                  | No           | 0.2561             | No                    | 0.4985             |
| PA 1 vs. PB 2                  | No           | 0.1602             | No                    | 0.4369             |
| PA 1 vs. ST 2                  | No           | 0.891              | No                    | 0.981              |
| PB 1 vs. ST 1                  | No           | 0.3857             | No                    | 0.3388             |
| PB 1 vs. None 2                | No           | 0.0647             | Yes                   | < 0.0001           |
| PB 1 vs. PA 2                  | No           | 0.0785             | No                    | 0.7278             |
| PB 1 vs. PB 2                  | Yes          | < 0.0001           | No                    | 0.108              |
| PB 1 vs. ST 2                  | Yes          | 0.0068             | No                    | 0.3381             |
| ST 1 vs. None 2                | Yes          | 0.0053             | Yes                   | 0.0003             |
| ST 1 vs. PA 2                  | No           | 0.4387             | No                    | 0.1128             |
| ST 1 vs. PB 2                  | Yes          | 0.0014             | Yes                   | 0.0029             |
| ST 1 vs. ST 2                  | No           | 0.0785             | Yes                   | 0.0236             |
| None 2 vs. PA 2                | Yes          | < 0.0001           | Yes                   | < 0.0001           |
| None 2 vs. PB 2                | Yes          | < 0.0001           | Yes                   | < 0.0001           |
| None 2 vs. ST 2                | Yes          | < 0.0001           | Yes                   | < 0.0001           |
| PA 2 vs. PB 2                  | Yes          | 0.0025             | No                    | 0.0953             |
| PA 2 vs. ST 2                  | No           | 0.2213             | No                    | 0.4187             |
| PB 2 vs. ST 2                  | No           | 0.0608             | No                    | 0.3844             |

†, culture with M $\phi$ -depleted PBMC

‡, culture with total PBMC
