# Supplementary material for: Crosstalk between leukocytes triggers differential immune responses against Salmonella enterica serovars Typhi and Paratyphi
Source: PubMed Central journal article supplement (PMC6709971; doi:10.1371/journal.pntd.0007650), 2019-08-14
Supplement: pntd.0007650.s009.pdf [file pntd.0007650.s009.pdf]

**S7 Table.** Statistical analyses of **Fig 9B**

| 1way ANOVA                     | Significant? | Individual<br><i>P</i> Value |
|--------------------------------|--------------|------------------------------|
| None 1 <sup>†</sup> vs. PA 1   | Yes          | 0.0015                       |
| None 1 vs. PB 1                | Yes          | 0.0005                       |
| None 1 vs. ST 1                | Yes          | 0.0002                       |
| None 1 vs. None 2 <sup>‡</sup> | No           | 0.7082                       |
| None 1 vs. PA 2                | Yes          | 0.0015                       |
| None 1 vs. PB 2                | Yes          | 0.0005                       |
| None 1 vs. ST 2                | Yes          | 0.004                        |
| PA 1 vs. PB 1                  | No           | 0.0908                       |
| PA 1 vs. ST 1                  | Yes          | 0.0042                       |
| PA 1 vs. None 2                | Yes          | 0.0016                       |
| PA 1 vs. PA 2                  | Yes          | 0.0027                       |
| PA 1 vs. PB 2                  | Yes          | 0.0021                       |
| PA 1 vs. ST 2                  | Yes          | 0.0068                       |
| PB 1 vs. ST 1                  | Yes          | 0.0007                       |
| PB 1 vs. None 2                | Yes          | 0.0005                       |
| PB 1 vs. PA 2                  | Yes          | 0.0069                       |
| PB 1 vs. PB 2                  | Yes          | 0.0011                       |
| PB 1 vs. ST 2                  | Yes          | 0.0027                       |
| ST 1 vs. None 2                | Yes          | 0.0004                       |
| ST 1 vs. PA 2                  | Yes          | 0.0121                       |
| ST 1 vs. PB 2                  | No           | 0.3757                       |
| ST 1 vs. ST 2                  | No           | 0.2957                       |
| None 2 vs. PA 2                | Yes          | 0.0015                       |
| None 2 vs. PB 2                | Yes          | 0.0006                       |
| None 2 vs. ST 2                | Yes          | 0.0027                       |
| PA 2 vs. PB 2                  | Yes          | 0.0026                       |
| PA 2 vs. ST 2                  | Yes          | 0.0262                       |
| PB 2 vs. ST 2                  | No           | 0.6866                       |

†, culture with M $\phi$ -depleted PBMC

‡, culture with total PBMC
